# Supplementary material for: Nrf2, a PPARγ Alternative Pathway to Promote CD36 Expression on Inflammatory Macrophages: Implication for Malaria
Source: PubMed Central journal article supplement (PMC3174257; doi:10.1371/journal.ppat.1002254), 2011-09-15

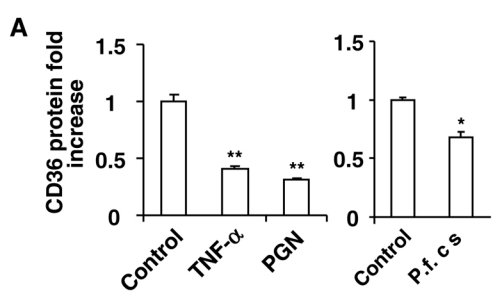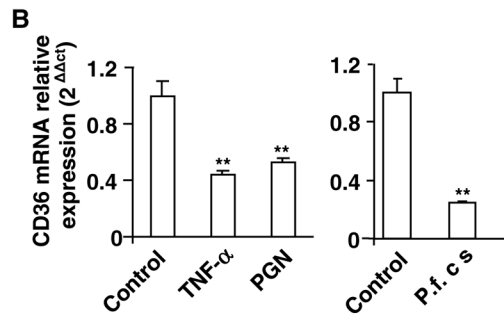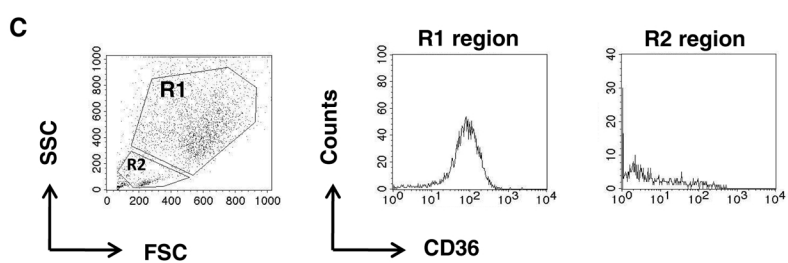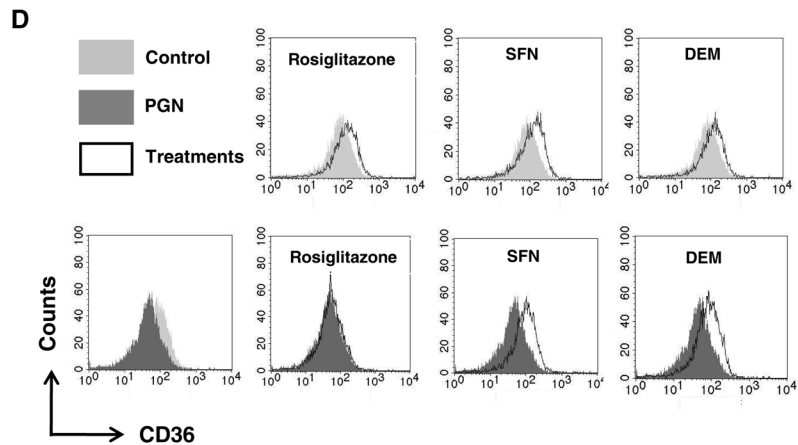

Supplement: ppat.1002254.s004.pdf [file ppat.1002254.s004.pdf]
