# Supplementary material for: Nrf2, a PPARγ Alternative Pathway to Promote CD36 Expression on Inflammatory Macrophages: Implication for Malaria
Source: PubMed Central journal article supplement (PMC3174257; doi:10.1371/journal.ppat.1002254), 2011-09-15
Supplement: ppat.1002254.s006.pdf [file ppat.1002254.s006.pdf]

| <i>Murine genes</i>     | Sequences                                                                         |
|-------------------------|-----------------------------------------------------------------------------------|
| <i>β-actin</i>          | sense 5'AGC CAT GTA CGT AGC CAT CC3'<br>antisense 5'CTC TCA GCT GTG GTG GTG AA3'  |
| <i>CD36</i>             | sense 5'GAG CAA CTG GTG GAT GGT TT3'<br>antisense 5'GCA GAA TCA AGG GAG AGC AC3'  |
| <i>HO-1</i>             | sense 5'CCA GAG TGT TCA TTC GAG CA3<br>antisense 5'CAC GCA TAT ACC CGC TAC CT3'   |
| <i>Nrf2</i>             | sense 5'CTC GCT GGA AAA AGA AGT GG-3'<br>antisense 5'CCG TCC AGG AGT TCA GAG AG3' |
| <i>PPAR<sub>γ</sub></i> | sense 5'AAT CCT TGG CCC TCT GAG AT3'<br>antisense 5'TTT TCA AGG GTG CCA GTT TC3'  |
| <i>Human genes</i>      | Sequences                                                                         |
| <i>β-actin</i>          | sense 5'CCT CAC CCT GAA GTA CC CA3'<br>antisense 5'TGC CAG ATT TTC TCC ATG TCG3'  |
| <i>CD36</i>             | sense 5'TGT AAC CCA GGA CGC TGA GG3'<br>antisense 5'GAA GGT TCG AAG ATG GCA CC3'  |
| <i>PPAR<sub>γ</sub></i> | sense 5'TTG TCA CGG AAC ACG TGC A3'<br>antisense 5'GGA GCG GGT GAA GAC TCA TG3'   |
